# Supplementary material
Source: PubMed Central journal article supplement (PMC8898267)
Supplement: NIHMS1767691-supplement-1.pdf [file NIHMS1767691-supplement-1.pdf]

Tonsil

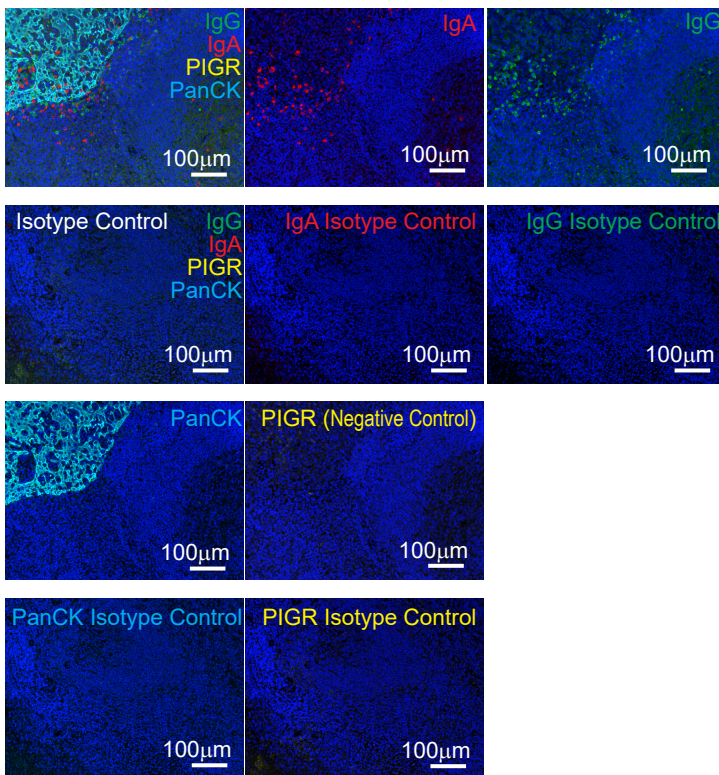

Tonsil

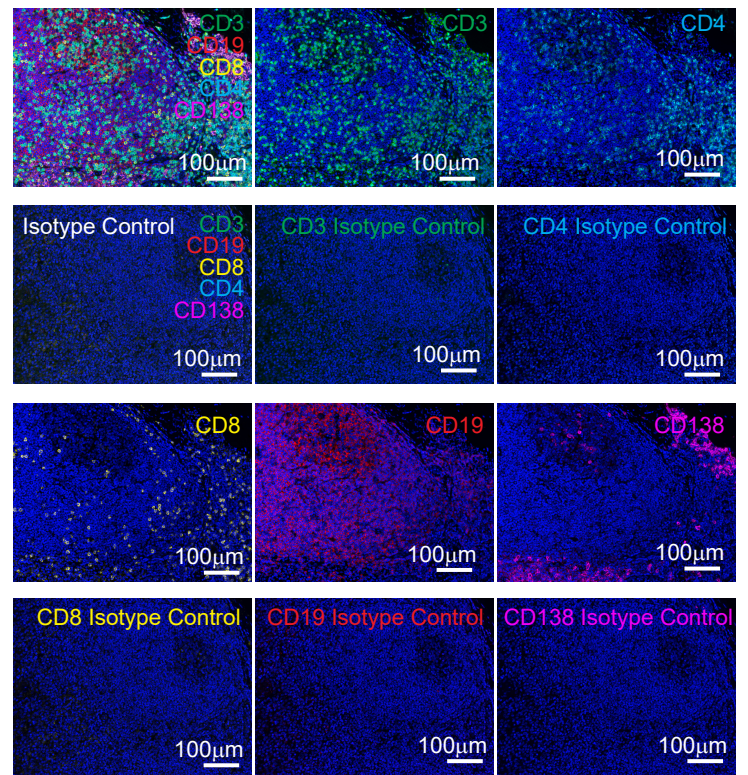

Negative controls in Glioblastoma

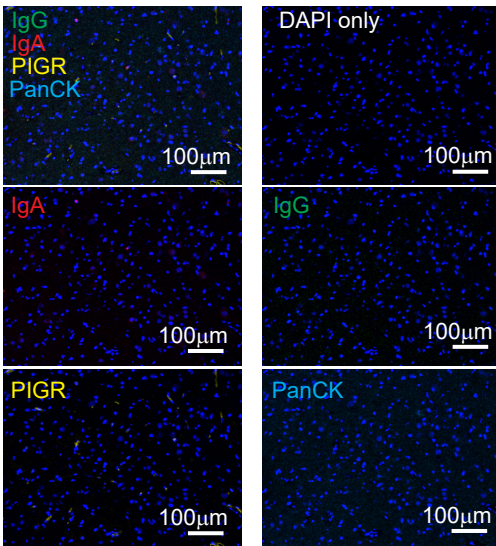

Negative controls in Glioblastoma

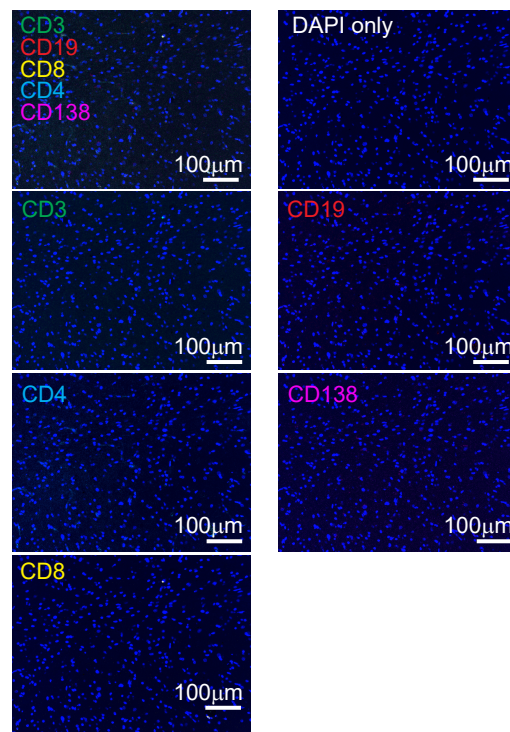

Colon adenocarcinoma

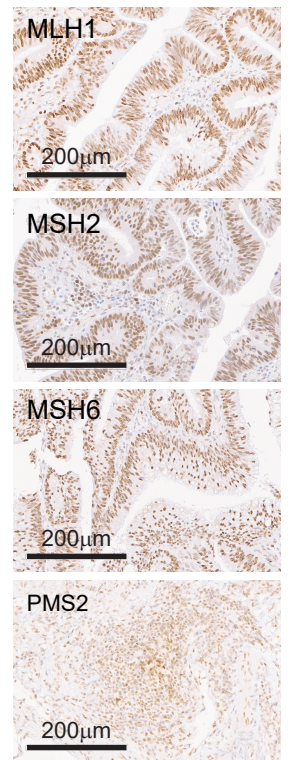

Kidney

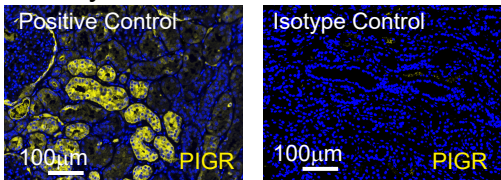

**Supplementary Figure S1. Optimization of immunohistochemistry staining for IgA, IgG, pIgR, PCK, CD3, CD4, CD8, CD19, CD138, MLH1, MSH2, MSH6 and PMS2.** Multiplex staining of tonsil (positive control, except for pIgR;  $n = 5$ ) and glioblastoma tissue sections (negative control;  $n = 5$ ) with anti-human IgA, IgG, pIgR, PCK, CD3, CD4, CD8, CD19 and CD138 antibodies and respective isotype controls; and healthy kidney tissue sections ( $n = 4$ ) stained with anti-human pIgR antibody (positive control) and respective isotype controls. Immunohistochemistry staining of colon adenocarcinoma tissue sections (positive control,  $n = 3$ ) with anti-human MLH1, MSH2, MSH6 and PMS2 antibodies. Scale bar, 100 or 200  $\mu\text{m}$ , as indicated.
