# Supplementary material
Source: PubMed Central journal article supplement (PMC8898267)
Supplement: NIHMS1767691-supplement-4.pdf [file NIHMS1767691-supplement-4.pdf]

# Supplementary Figure S4

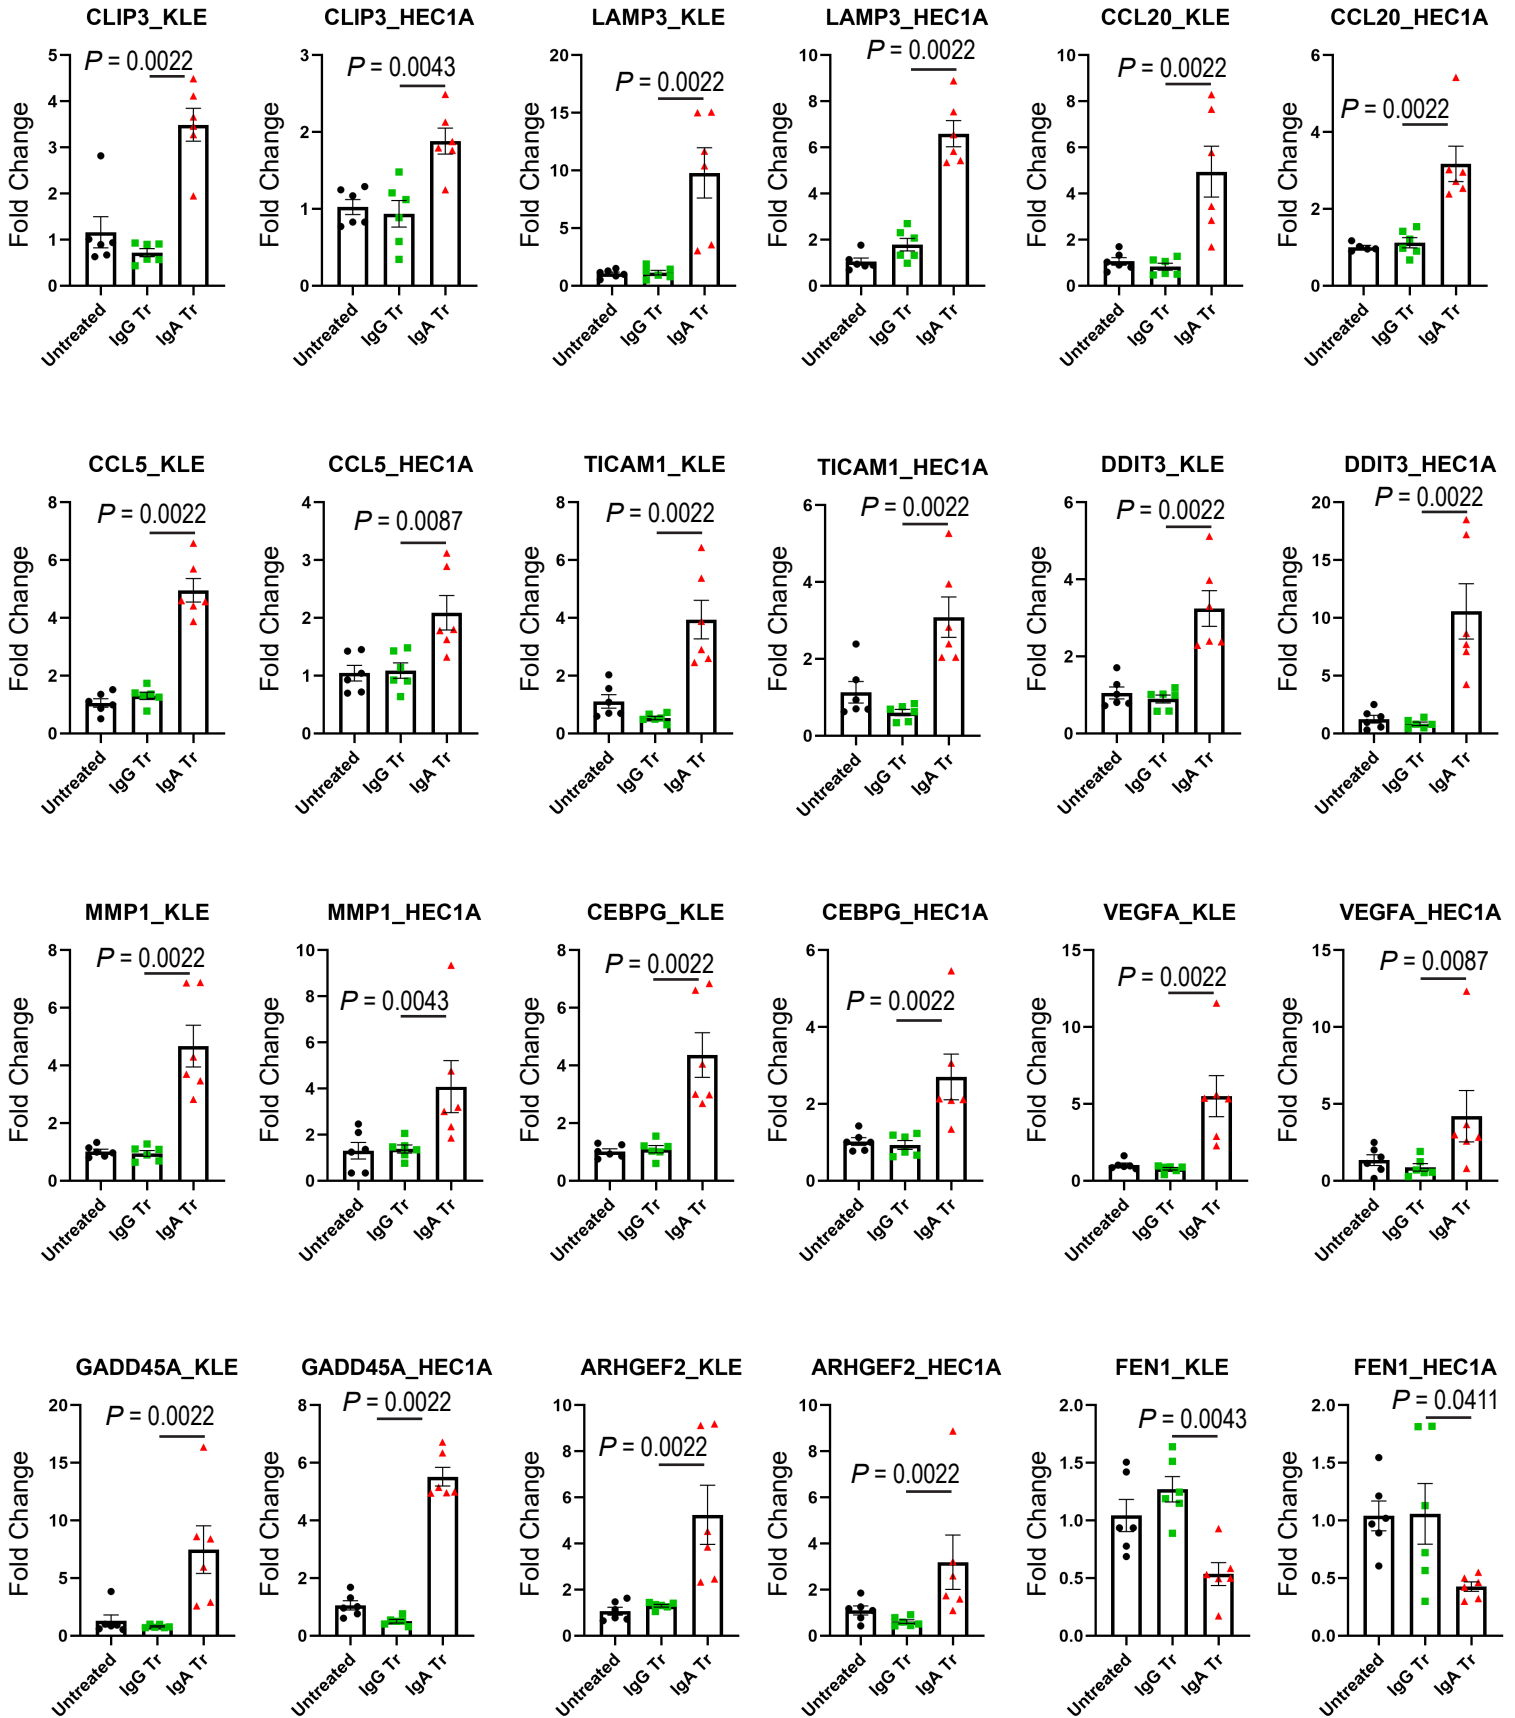

**Supplementary Figure S4. Quantitative reverse transcriptase (Q-RT) PCR confirmation of RNA sequencing data.** Q-RT PCR of candidate mRNAs, selected based on RNA sequencing results, showing considerable fold changes in IgA-treated PIGR<sup>transduced</sup>-KLE or HEC-1-A cells, but not in IgG-treated cells. ( $n = 6$ , each group); unpaired two-tailed Mann Whitney test.
