# Supplementary material
Source: PubMed Central journal article supplement (PMC8898267)
Supplement: NIHMS1767691-supplement-5.pdf [file NIHMS1767691-supplement-5.pdf]

Supplementary Figure S5

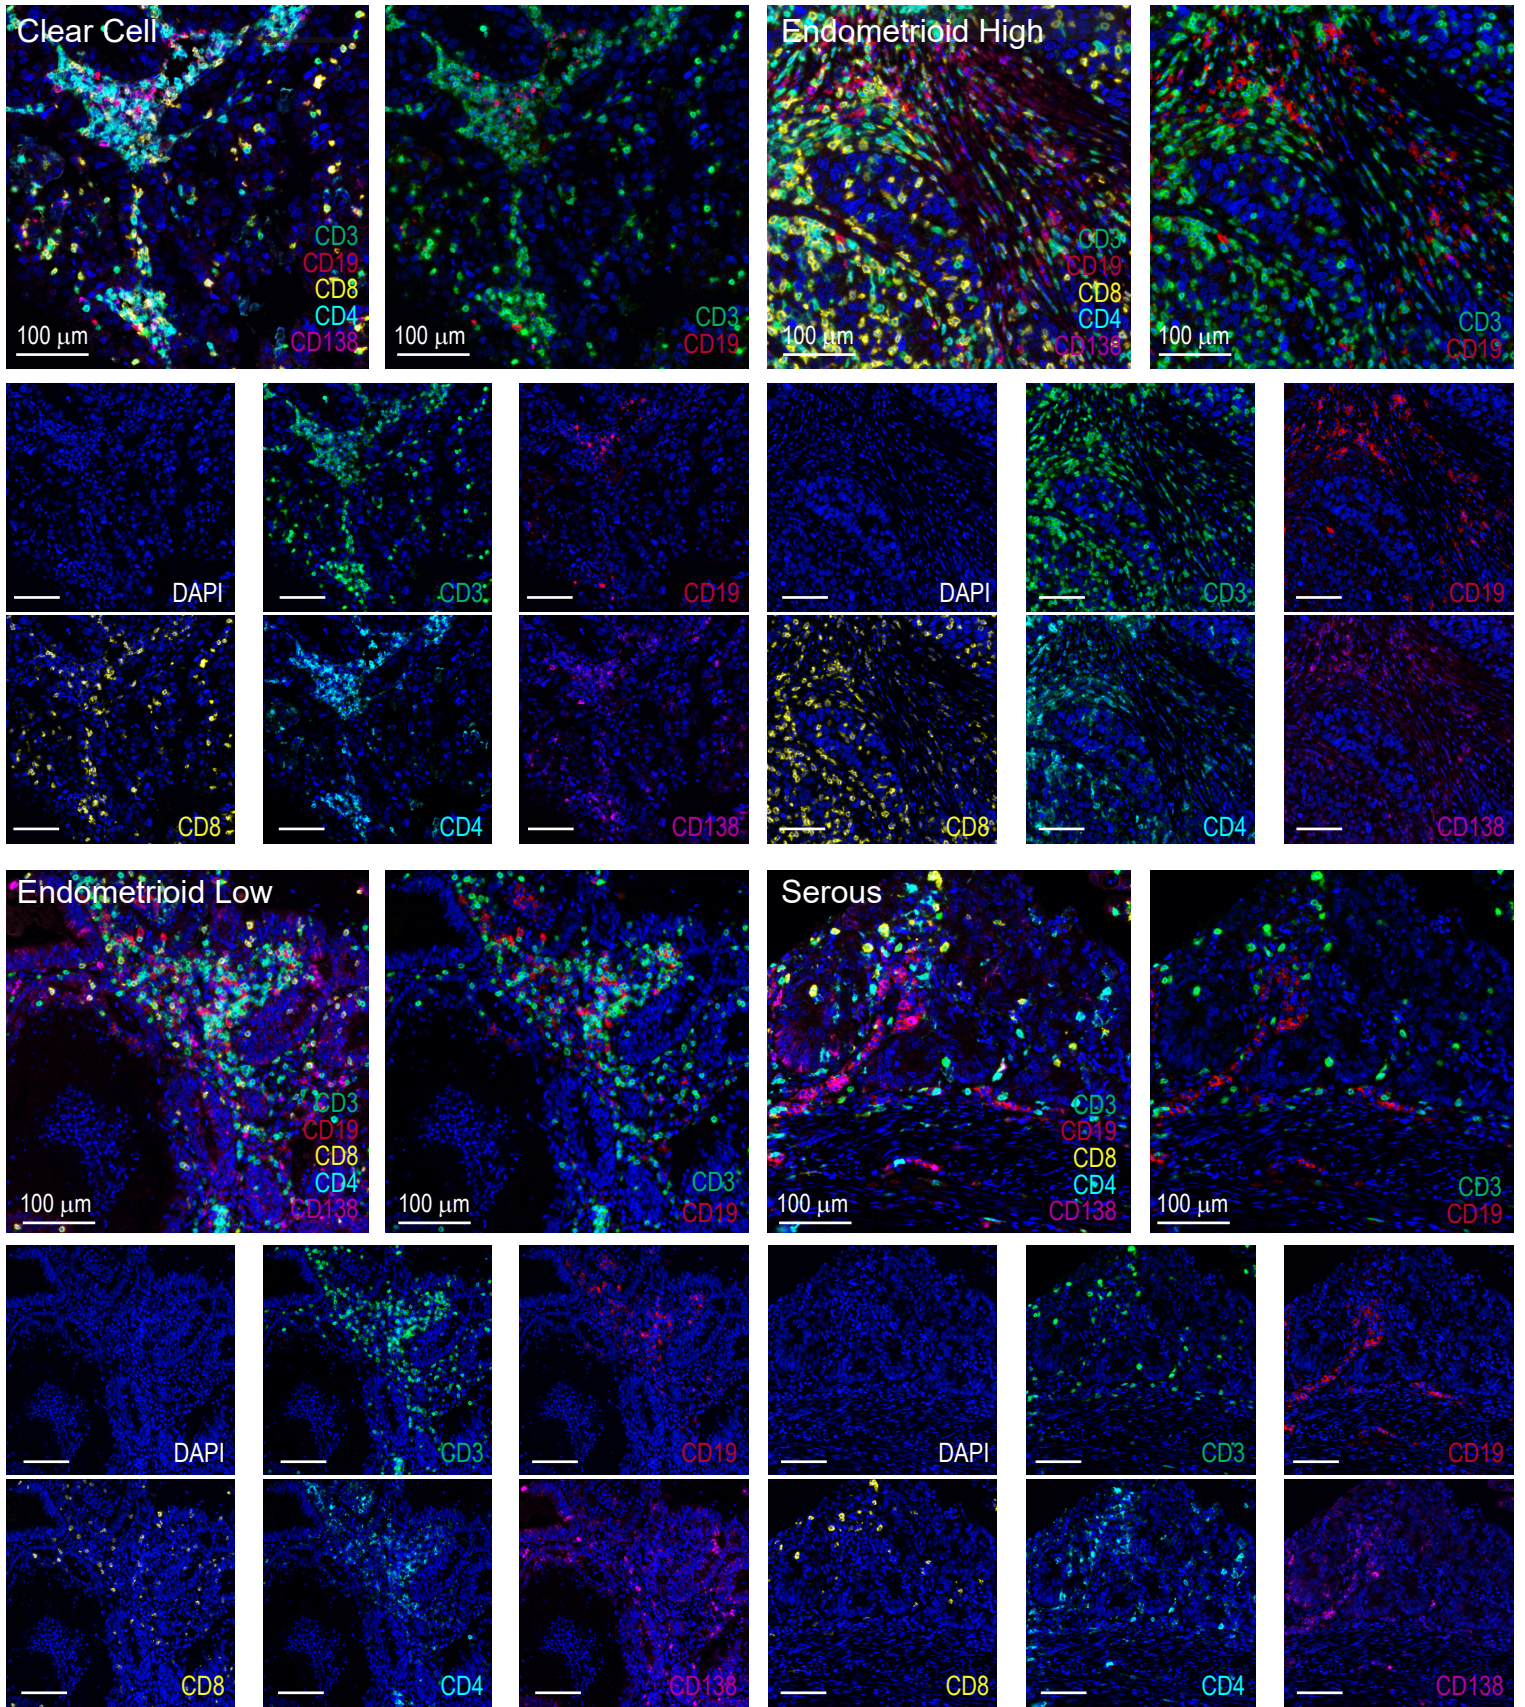

**Supplementary Figure S5. Representative multiplex immunohistochemistry images.** CD19, CD138, CD3, CD4, CD8 staining in tumors in clear cell, endometrioid type high grade, endometrioid type low grade, and serous endometrial cancer. Scale bar, 100  $\mu\text{m}$ , as indicated.
