# Supplementary material
Source: PubMed Central journal article supplement (PMC8898267)
Supplement: NIHMS1767691-supplement-6.pdf [file NIHMS1767691-supplement-6.pdf]

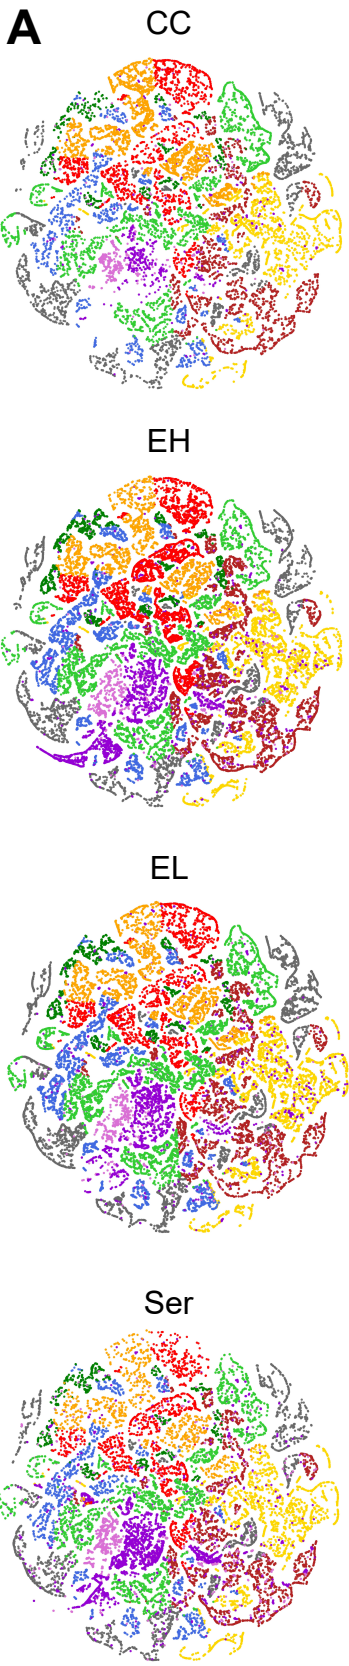

Cytotoxic T cell & Helper T cells  
 Cytotoxic T cells    Helper T cells  
 Cytotoxic T cells    Helper T cells  
 Cytotoxic T cells    Helper T cells  
 Non-Plasma B cells    Plasma cells

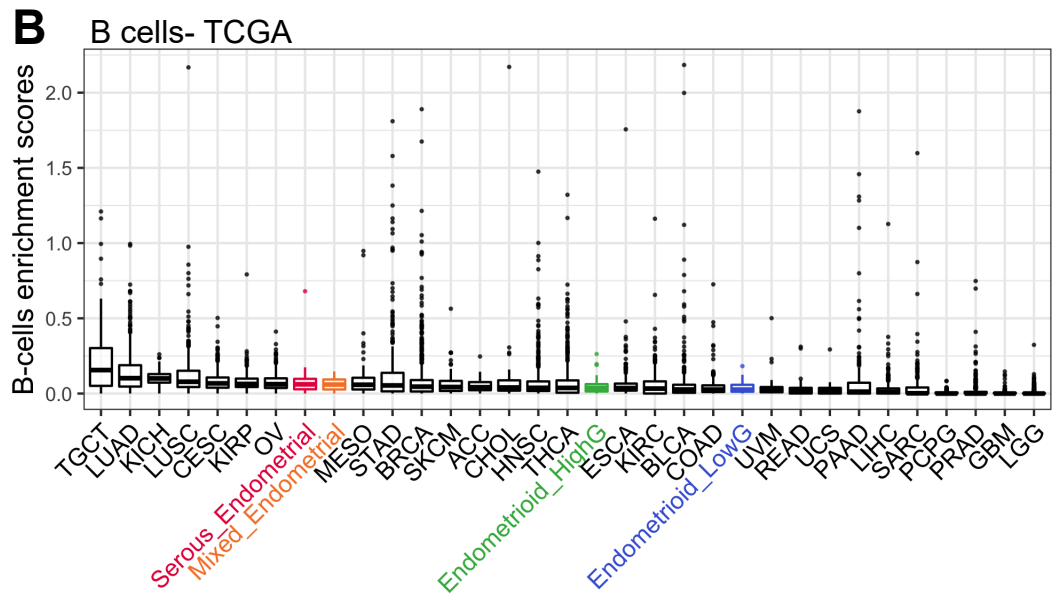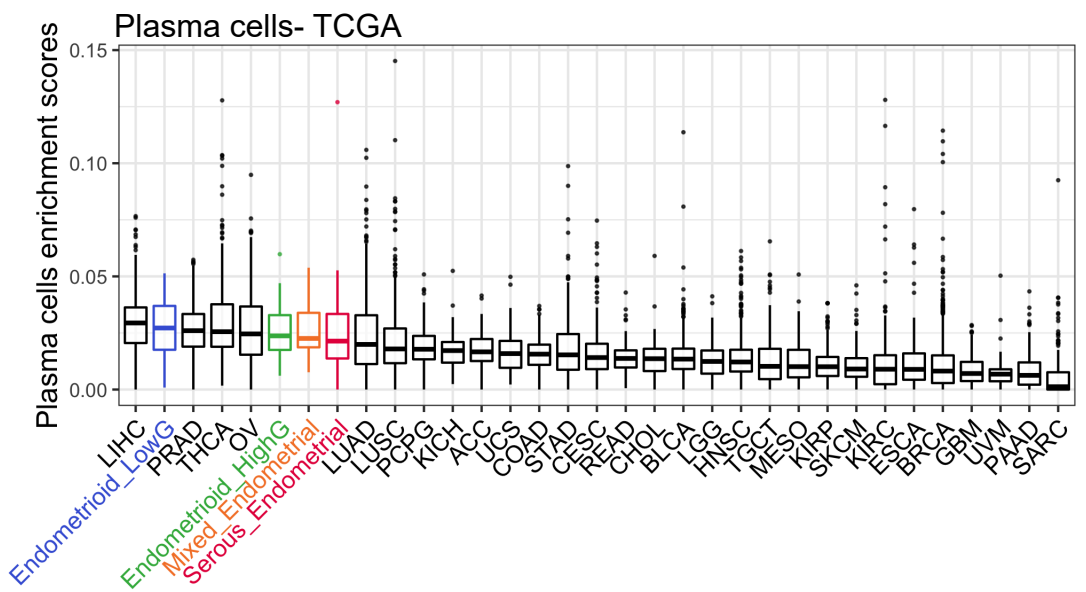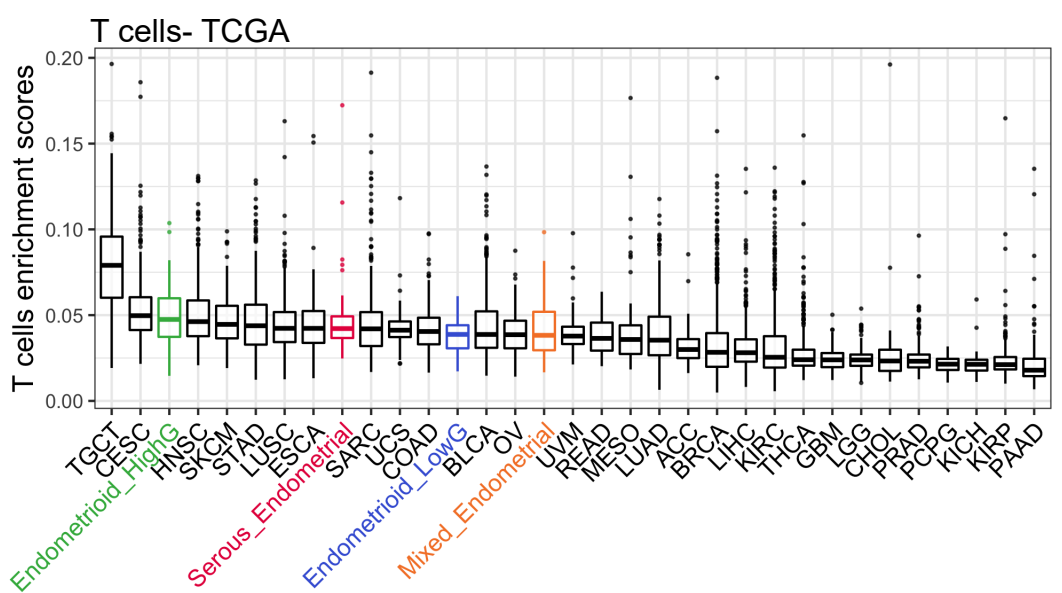

**Supplementary Figure S6. Clusters of cytotoxic and helper T cells, non-plasma B cells and plasma cells in different histology types; and TCGA analyses showing enrichment of B cells, plasma cells and T cells in different cancer types.** (A) t-SNE embedding of 84 thousand cells highlighting diverse T cell and B cell clusters across the four histology types. Each dot is a cell and colors correspond to cell types inferred by spatial neighborhood-based clustering. Unique spatial neighborhoods are characterized by spatially-distinct T cell and B cell clusters. Certain clusters with the same name are differently colored because they are spatially distinct clusters. Each cell represents not only itself but also its immediate neighborhood and this is used for identifying spatial clusters or ‘cellular neighborhoods’. A sample can be viewed as a collection of such cellular neighborhoods where the same functional cluster can exist in multiple spatial locations. CC, clear cell endometrial cancer; EH, endometrioid type high grade (grade 3) endometrial cancer; EL, endometrioid type low grade endometrial cancer; Ser, Serous endometrial cancer. (B) Enrichment of B cells, plasma cells and T cells in different cancer types in different cancers including serous, endometrioid high grade, endometrioid low grade and mixed endometrial cancers. TGCT, Testicular Germ Cell Tumors; LUAD, Lung adenocarcinoma; KICH, Kidney Chromophobe; LUSC, Lung squamous cell carcinoma; CESC, Cervical squamous cell carcinoma and endocervical adenocarcinoma; KIRP, Kidney renal papillary cell carcinoma; OV, Ovarian serous cystadenocarcinoma; MESO, Mesothelioma; STAD, Stomach adenocarcinoma; BRCA, Breast invasive carcinoma; SKCM, Skin Cutaneous Melanoma; ACC, Adrenocortical carcinoma; CHOL, Cholangiocarcinoma; HNSC, Head and Neck squamous cell carcinoma; THCA, Thyroid carcinoma; ESCA, Esophageal carcinoma; KIRC, Kidney renal clear cell carcinoma; BLCA, Bladder Urothelial Carcinoma; COAD, Colon adenocarcinoma; UVM, Uveal Melanoma; READ, Rectum adenocarcinoma; UCS, Uterine Carcinosarcoma; PAAD, Pancreatic adenocarcinoma;

LIHC, Liver hepatocellular carcinoma; SARC, Sarcoma; PCPG, Pheochromocytoma and Paranglioma; PRAD, Prostate adenocarcinoma; GBM, Glioblastoma multiforme; LGG, Brain Lower Grade Glioma.
