# Supplementary material
Source: PubMed Central journal article supplement (PMC8898267)
Supplement: NIHMS1767691-supplement-8.pdf [file NIHMS1767691-supplement-8.pdf]

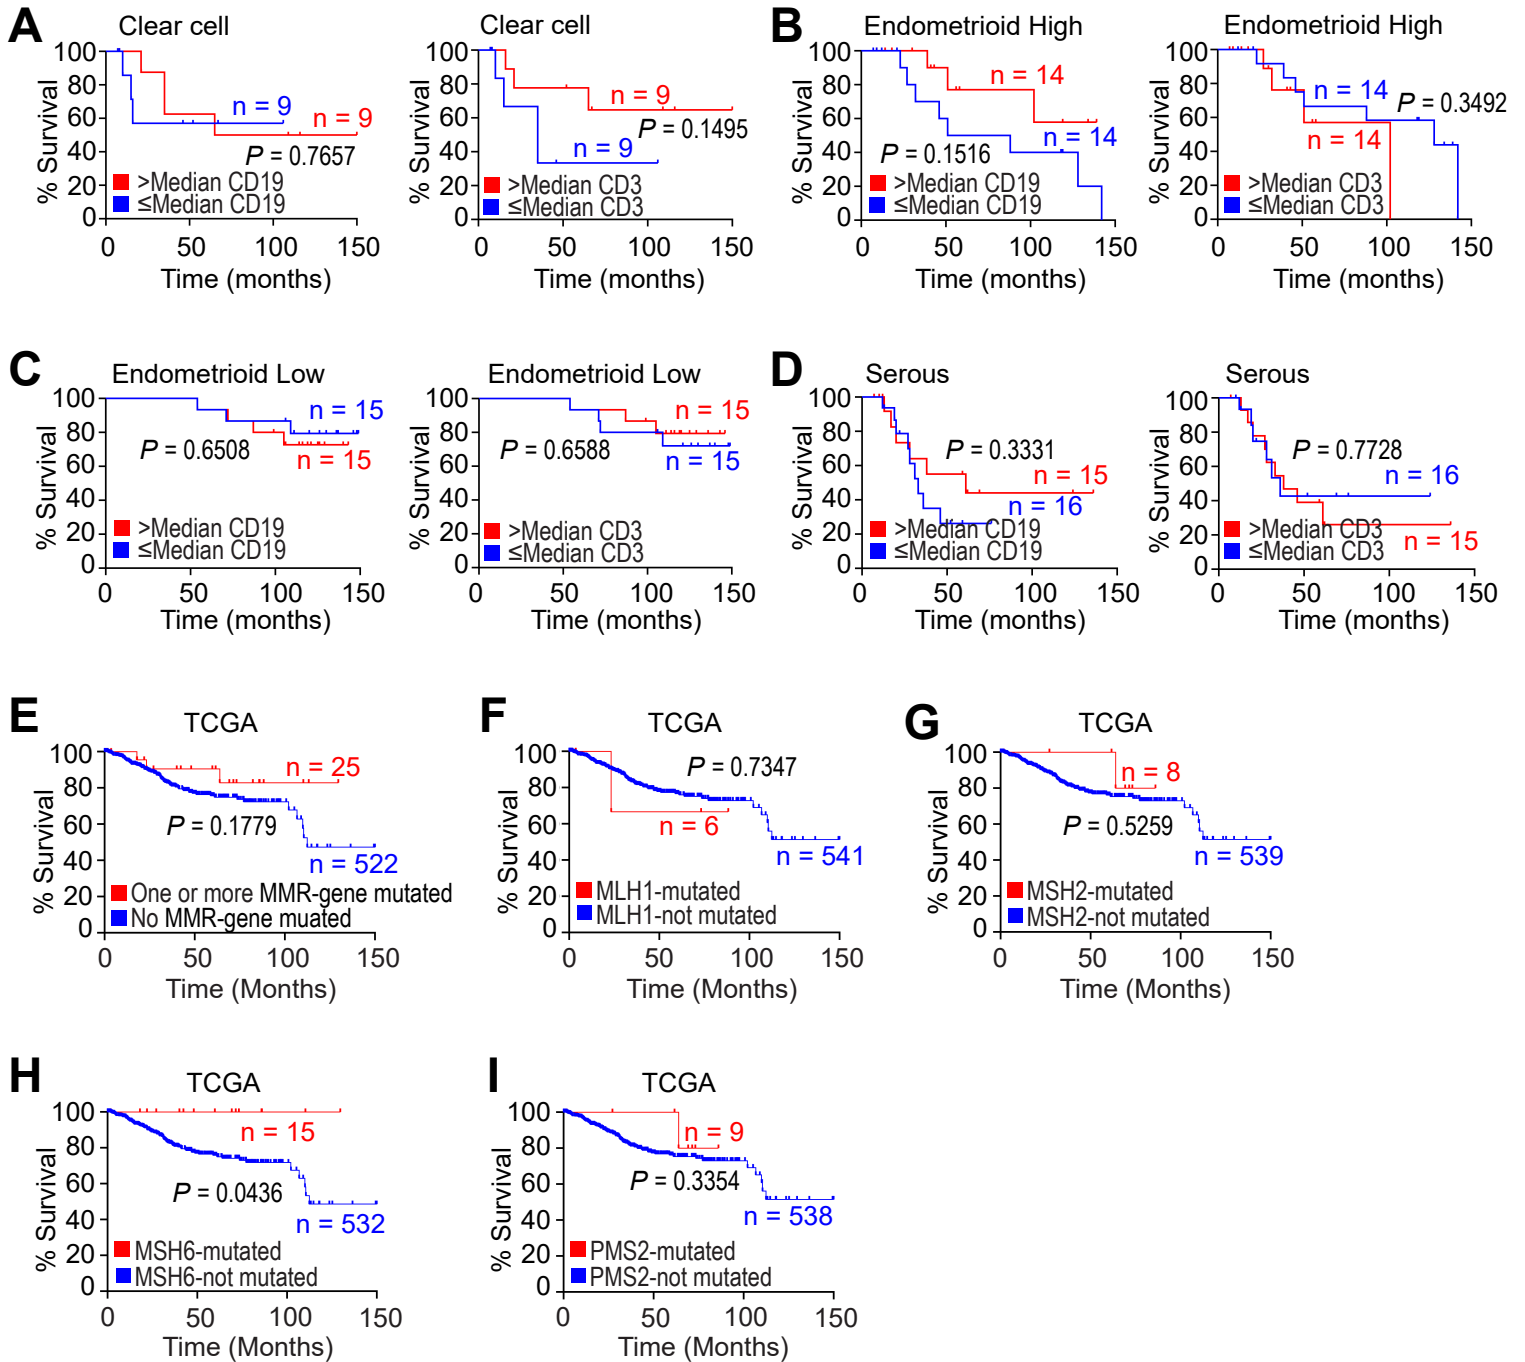

**Supplementary Figure S8. Survival analyses according to B cells and T cells infiltrations in different endometrial cancer histology, and for individual or combined mutations or deletions of four MMR genes from TCGA datasets.** (A) Survival analysis according to the percentages of CD19<sup>+</sup> B cells (*left*, averaged from duplicated cores, threshold median;  $P = 0.7657$ ) and CD3<sup>+</sup> T cells (*right*, averaged from duplicated cores, threshold median;  $P = 0.1495$ ) in clear cell endometrial cancer. two-sided log-rank (Mantel–Cox) test. (B) Survival analysis according to the percentages of CD19<sup>+</sup> B cells (*left*, averaged from duplicated cores, threshold median;  $P = 0.1516$ ) and CD3<sup>+</sup> T cells (*right*, averaged from duplicated cores, threshold median;  $P = 0.3492$ ) in endometrioid high grade endometrial cancer. two-sided log-rank (Mantel–Cox) test. (C) Survival analysis according to the percentages of CD19<sup>+</sup> B cells (*left*, averaged from duplicated cores, threshold median;  $P = 0.6508$ ) and CD3<sup>+</sup> T cells (*right*, averaged from duplicated cores, threshold median;  $P = 0.6588$ ) in endometrioid low grade endometrial cancer. two-sided log-rank (Mantel–Cox) test. (D) Survival analysis according to the percentages of CD19<sup>+</sup> B cells (*left*, averaged from duplicated cores, threshold median;  $P = 0.3331$ ) and CD3<sup>+</sup> T cells (*right*, averaged from duplicated cores, threshold median;  $P = 0.7728$ ) in serous endometrial cancer. two-sided log-rank (Mantel–Cox) test. CC, clear cell endometrial cancer; EH, endometrioid type high grade (grade 3) endometrial cancer; EL, endometrioid type low grade endometrial cancer; Ser, Serous endometrial cancer. (E) Survival analysis with or without mutations or deletions in one or more of the four MMR genes.  $P = 0.1779$ ; two-sided log-rank (Mantel–Cox) test. (F) Survival analysis according to mutations or deletions in MLH1.  $P = 0.7347$ ; two-sided log-rank (Mantel–Cox) test. (G) Survival analysis according to mutations or deletions in MSH2.  $P = 0.5259$ ; two-sided log-rank (Mantel–Cox) test. (H) Survival analysis according to mutations or deletions in MSH6.  $P =$

0.0436; two-sided log-rank (Mantel–Cox) test. (I) Survival analysis according to mutations or deletions in PMS2.  $P = 0.3354$ ; two-sided log-rank (Mantel–Cox) test.
